# Supplementary material for: Co-expression of adjacent genes in yeast cannot be simply attributed to shared regulatory system
Source: PubMed Central journal article supplement (PMC2045684; doi:10.1186/1471-2164-8-352), 2007-10-03
Supplement: 1471-2164-8-352-S1.pdf [file 1471-2164-8-352-S1.pdf]

## Figure Legends

### S-Fig. 1

Comparison of co-expression level for three adjacent patterns per condition-specific dataset (A: *alpha*, B: *cdc*, C: *crz1p*, D: *env*). The upper figure illustrates the cumulative distribution of pairwise coefficients. The lower table indicates the significance suggested by KS test (*p* value).

### S-Fig. 2

Comparison of co-expression level between conserved adjacent pairs and non-conserved adjacent pairs. A: *alpha*, B: *cdc*, C: *crz1p*, D: *env*.

### S-Fig. 3

Comparison of co-expression level between the adjacent pairs with shared TFs and those without shared TFs. A: *alpha*, B: *cdc*, C: *crz1p*, D: *env*.

S-Fig 1A (alpha)

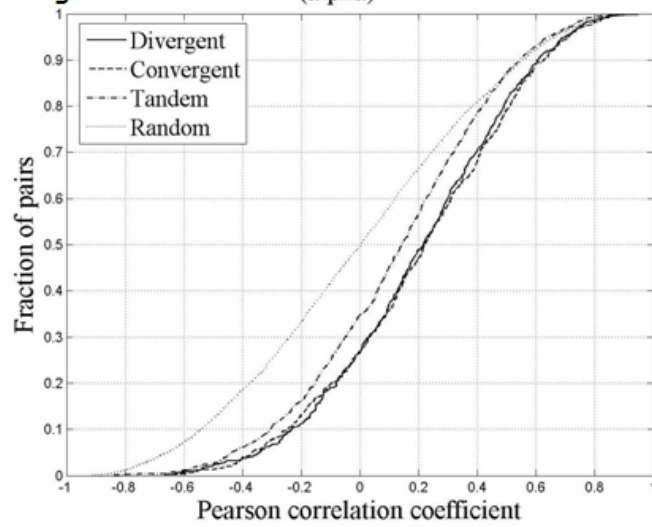

|                  | Convergent | Tandem     | Random     |
|------------------|------------|------------|------------|
| Divergent (594)  | 0.8941     | 0.0022     | 8.144e-028 |
| Convergent (641) |            | 9.948e-005 | 1.114e-028 |
| Tandem (1020)    |            |            | 2.209e-024 |

S-Fig 1B (cdc)

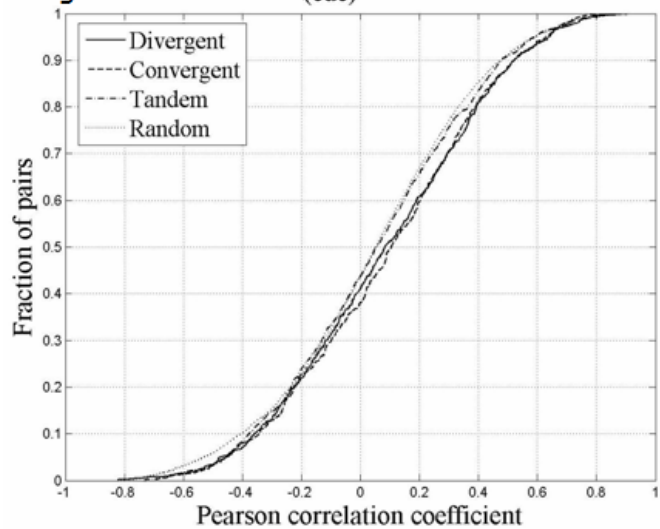

|                  | Convergent | Tandem | Random |
|------------------|------------|--------|--------|
| Divergent (707)  | 0.6730     | 0.0545 | 0.0023 |
| Convergent (735) |            | 0.0082 | 0.0002 |
| Tandem (1264)    |            |        | 0.3337 |

S-Fig 1C (crz1p)

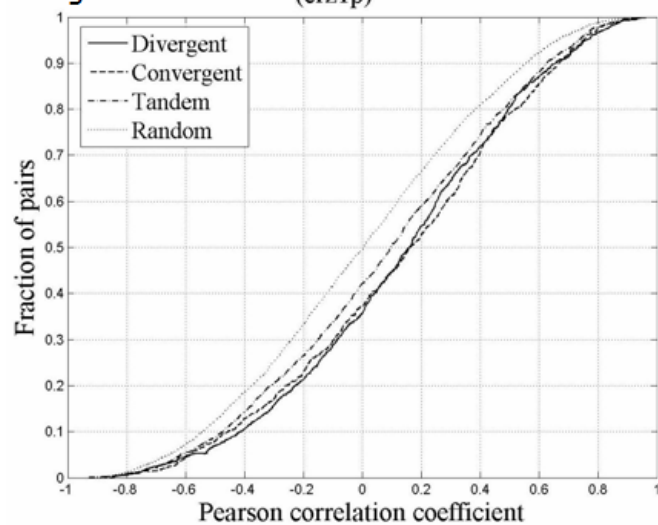

|                  | Convergent | Tandem | Random     |
|------------------|------------|--------|------------|
| Divergent (903)  | 0.3529     | 0.0136 | 5.305e-014 |
| Convergent (943) |            | 0.0069 | 4.096e-015 |
| Tandem (1613)    |            |        | 1.490e-008 |

S-Fig 1D (env)

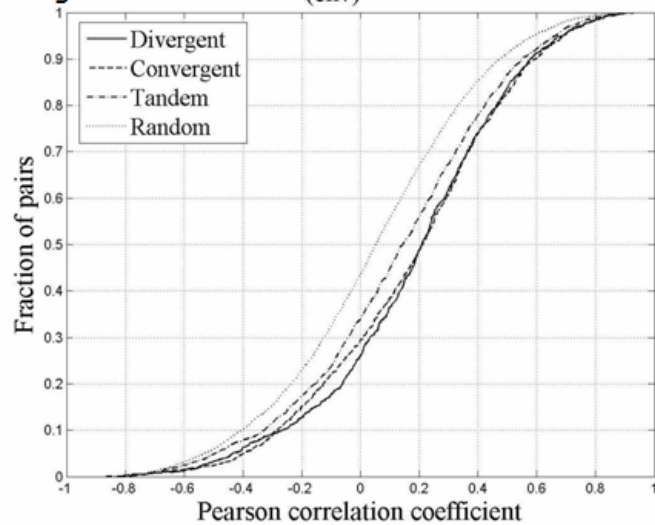

|                  | Convergent | Tandem     | Random     |
|------------------|------------|------------|------------|
| Divergent (917)  | 0.1686     | 3.756e-005 | 3.303e-028 |
| Convergent (946) |            | 0.0013     | 8.302e-025 |
| Tandem (1628)    |            |            | 7.183e-015 |

S-Fig 2A

(alpha)

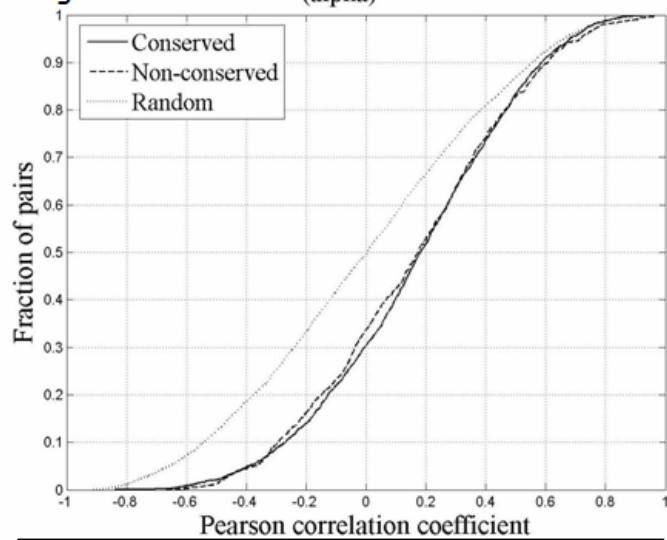

|                      | Non-conserved | Random     |
|----------------------|---------------|------------|
| Conserved (2255)     | 0.1462        | 9.883e-058 |
| Non-conserved (1002) |               | 9.592e-028 |

S-Fig 2B

(cdc)

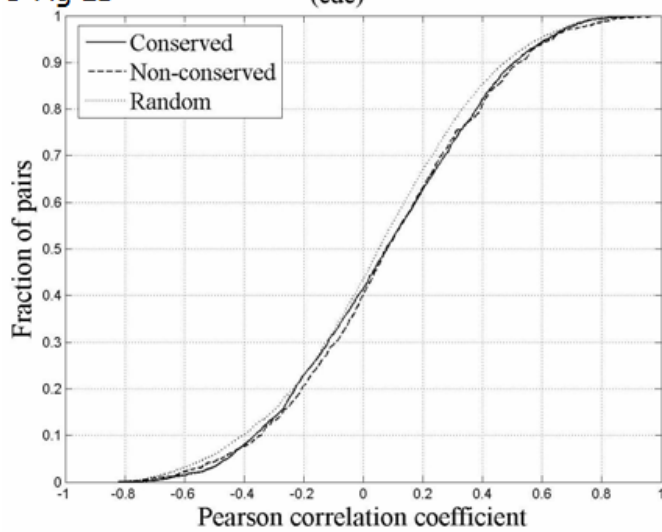

|                      | Non-conserved | Random |
|----------------------|---------------|--------|
| Conserved (2706)     | 0.3913        | 0.0007 |
| Non-conserved (1312) |               | 0.0068 |

S-Fig 2C

(crz1p)

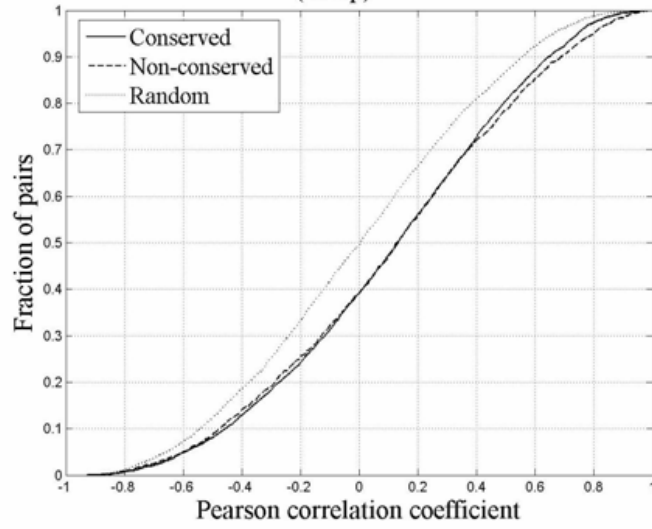

|                      | Non-conserved | Random     |
|----------------------|---------------|------------|
| Conserved (3450)     | 0.3841        | 2.488e-024 |
| Non-conserved (1716) |               | 2.519e-015 |

S-Fig 2D

(env)

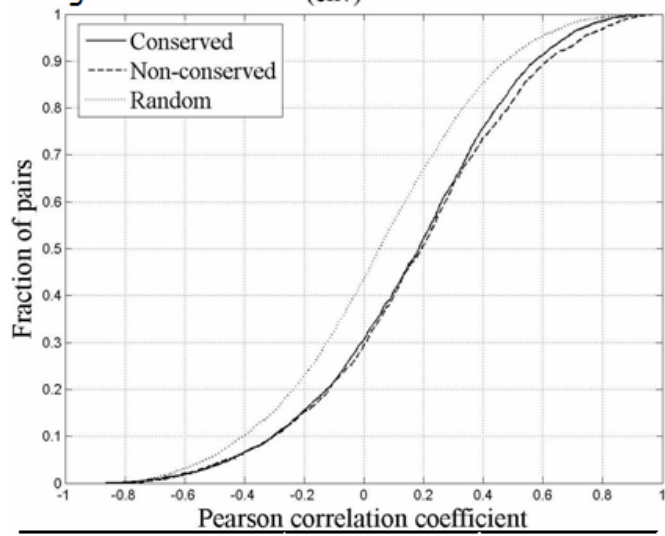

|                      | Non-conserved | Random     |
|----------------------|---------------|------------|
| Conserved (3491)     | 0.1265        | 4.905e-044 |
| Non-conserved (1740) |               | 1.407e-031 |

S-Fig 3A

(alpha)

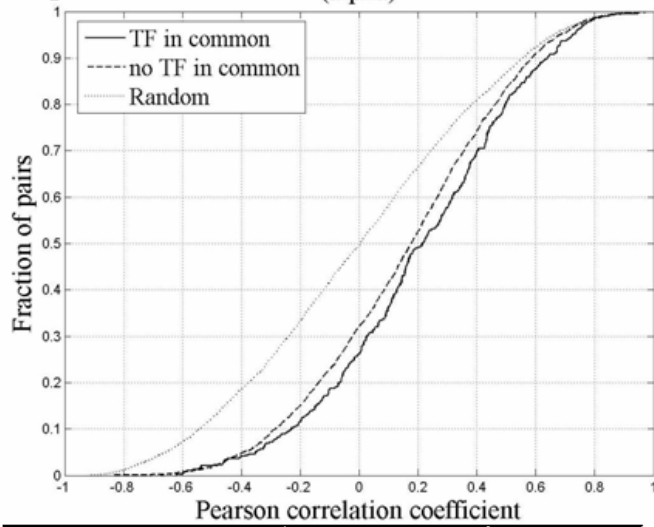

|                        | No TF in common | Random     |
|------------------------|-----------------|------------|
| TF in common (390)     | 0.0569          | 2.463e-020 |
| No TF in common (2867) |                 | 3.689e-061 |

S-Fig 3B

(cdc)

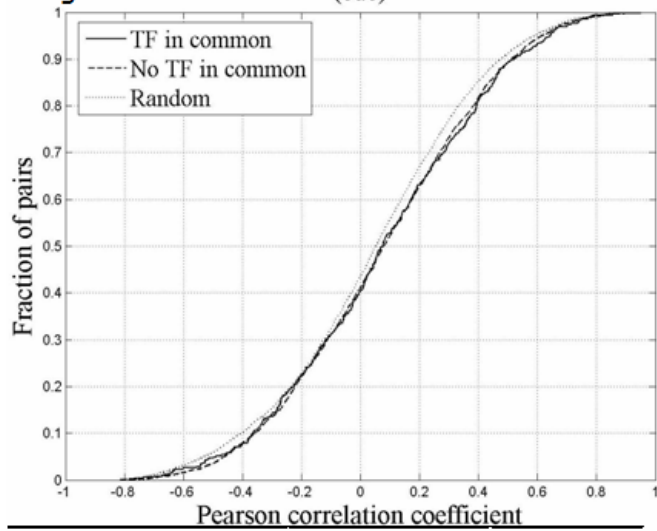

|                        | No TF in common | Random |
|------------------------|-----------------|--------|
| TF in common (495)     | 0.9702          | 0.0545 |
| No TF in common (3523) |                 | 0.0006 |

S-Fig 3C

(crz1p)

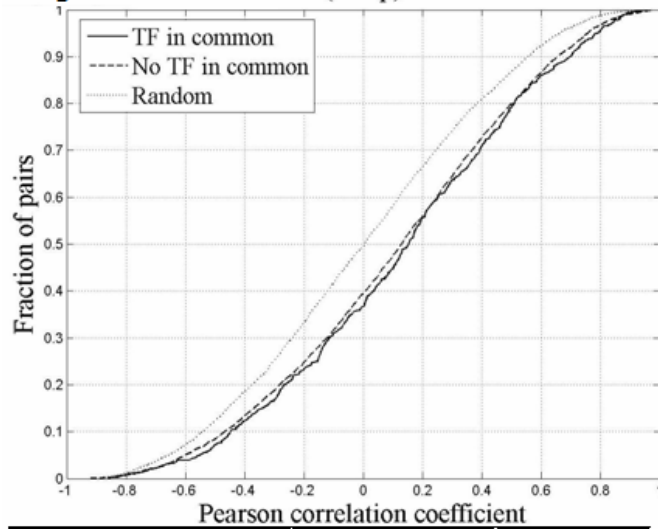

|                        | No TF in common | Random     |
|------------------------|-----------------|------------|
| TF in common (622)     | 0.7165          | 2.462e-009 |
| No TF in common (4544) |                 | 2.798e-026 |

S-Fig 3D

(env)

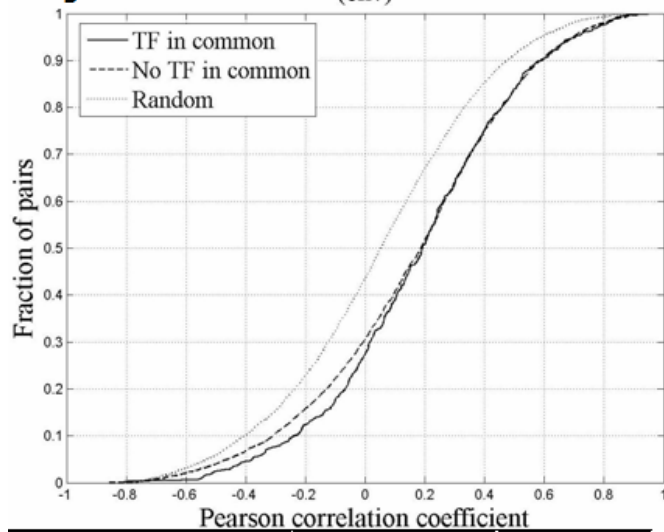

|                        | No TF in common | Random     |
|------------------------|-----------------|------------|
| TF in common (632)     | 0.0958          | 2.926e-015 |
| No TF in common (4599) |                 | 5.788e-052 |
